# Supplementary material
Source: Springer Nature journal article supplement (https://www.springermedizin.de/resource/supplementary/12889_2007_1118_MOESM4_ESM.pdf/9502490)
Supplement: MOESM4 [file 9502490]

## Age-stratified mortality rate by birth cohort

## Age-stratified rate ratio by birth cohort

Men

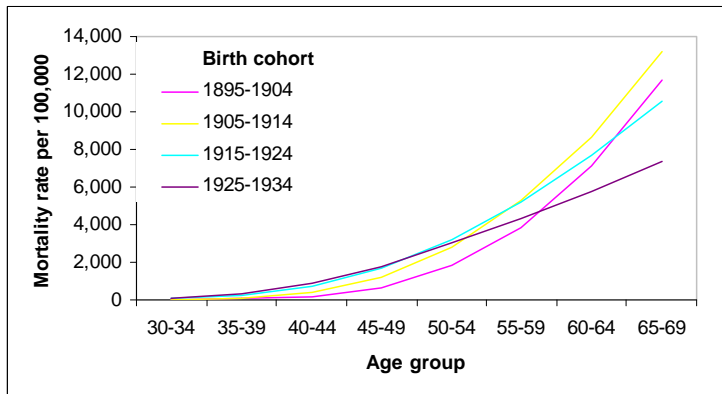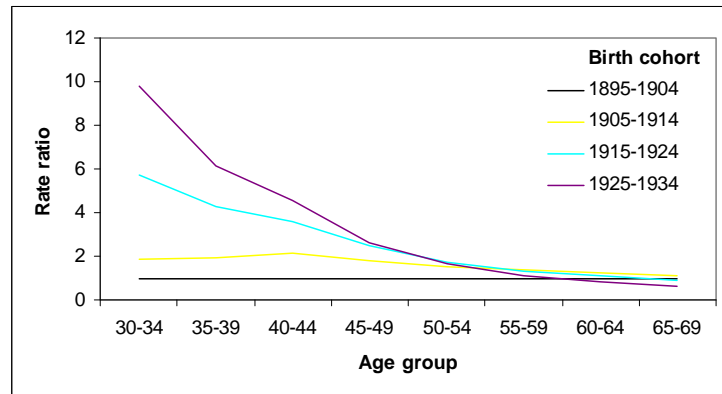

Women

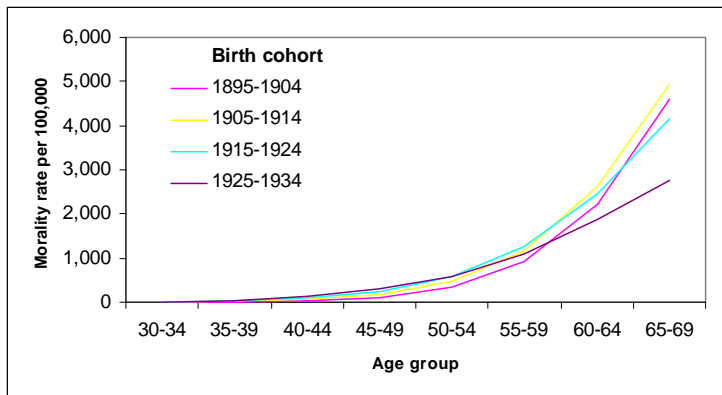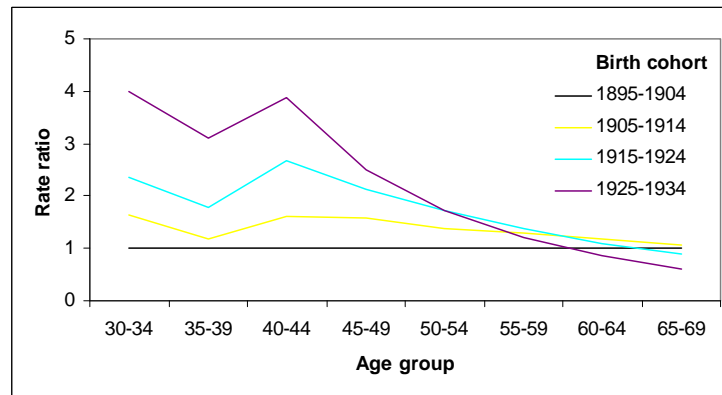

Base for rate ratio is the age-stratified mortality rate for the 1895-1904 cohort.

Note: scales for men and women are not the same.
